# Supplementary material for: Amino acid transporter SLC38A5 regulates developmental and pathological retinal angiogenesis
Source: eLife journal article supplement (doi:10.7554/elife.73105), 2022-11-18
Supplement: fig4-data1 [file Figure 4 source data.xlsx]

## Sheet: Fig 4A
	Relative Slc38a5 mRNA/18S		Normal			OIR
	P8	0.868914	1.145	1.00512	0.502266	0.748389	0.701522
	P12	2.88805	2.8569	3.04145	0.833684	0.994157	1.14864
	P14	1.56769	1.51543	1.68598	5.07063	4.89455	5.58694
	P17	0.679451	0.640222	0.612079	1.59274	1.65252	1.53022

## Sheet: Fig 4B
	Group	Normal	OIR
		1.35417	2.96157
		0.87585	2.77023
	Relative Slc38a5 mRNA/18S	0.843135	2.81294
		0.947314	2.97952
		1.13985	2.11797
		0.926099	1.77883

## Sheet: Fig 4C
	Group	Normal	OIR
		0.653129	1.82343
	Relative Slc38a5/GAPDH protein levels	1.33132	2.41105
		1.01556	1.89643

## Sheet: Fig 4D
	Group	WT	Slc38a5-/-
		0.828844	1.14533
		1.98346	0.465277
		0.710918	1.68771
		0.616413	1.28684
		0.788982	0.601206
		1.07138	1.00186
		1.27111	1.28175
		1.36433	1.08271
		1.05852	0.575071
	Relative VO	0.824099	1.11777
		0.884246	1.08902
		1.37331	1.29049
		0.680406	1.23687
		0.543979	1.22034
		1.03497	0.939221
		0.965028	1.48757
		1.27434	0.992094
		0.72566	0.81351
			1.98862
			0.566618
	Group	WT	Slc38a5-/-
		0.929064	0.667914
		1.12132	0.487045
		0.667914	0.789578
		0.487045	1.0164
		0.509448	0.70119
		0.837214	0.529401
		0.971646	0.586817
		1.63131	0.828538
		1.42279	0.652706
	Relative NV	0.749659	0.723704
		1.149	0.839142
		0.8148	0.663748
		0.895332	0.444811
		0.951036	0.653795
		1.14799	0.779145
		0.869384	0.804157
		0.933163	0.747227
		1.06684	0.931687
		0.973671	0.947238
		1.02633	0.716109
