# Supplementary material for: Amino acid transporter SLC38A5 regulates developmental and pathological retinal angiogenesis
Source: eLife journal article supplement (doi:10.7554/elife.73105), 2022-11-18
Supplement: fig5-data1 [file Figure 5 source data.xlsx]

## Sheet: Fig 5A
	Group	si-Ctrl	si-SLC38A5
		0.965025	0.126445
	Relative Slc38a5 mRNA/18S	1.08479	0.0898986
		0.955247	0.177849

## Sheet: Fig 5B
	Group	si-Ctrl	si-SLC38A5
		1.09438	0.561637
	Relative Slc38a5/GAPDH protein levels	1.07687	0.692604
		0.828748	0.474646

## Sheet: Fig 5C
	Group			si-Ctrl									si-SLC38A5
	0h	0	0	0	0	0	0	0	0	0	0	0	0	0	0	0	0
	24h	0.249	0.216	0.227	0.227	0.235	0.234	0.237	0.271	0.283	0.273	0.271	0.278	0.275	0.28	0.271	0.282
	48h	0.706827	0.990741	0.903084	0.885463	0.851064	0.905983	0.827004	0.793358	0.660777	0.736264	0.793358	0.694245	0.709091	0.703571	0.756458	0.687943
	72h	1.28916	1.59722	1.42731	1.4978	1.30213	1.44017	1.33333	1.08118	0.876325	0.956044	1.13653	1.05755	1.04364	0.939286	0.95941	0.93617

## Sheet: Fig 5D
	Group	si-Ctrl	si-SLC38A5
		si-Ctrl	si-Slc38a5
		0.655054	0.701513
		0.738065	0.61348
		0.593038	0.407798
		0.826386	0.68019
		0.584757	0.645586
		0.551497	0.594642
		0.609411	0.713052
		0.861579	0.738484
		0.836316	0.81262
		0.884131	0.808767
		0.819647	0.707033
	Migrated ratio	0.619131	0.572765
		0.679245	0.575537
		0.865578	0.676872
		0.765196	0.750645
		0.7279	0.745578
		0.630444	0.663039
		0.62449	0.690853
		0.602449	0.521548
		0.72119	0.701348
		0.608271	0.624684
		0.617502	0.436529
			0.465453

## Sheet: Fig 5E
	Group	si-Ctrl	si-SLC38A5
		si-Ctrl	si-Slc38a5
		44.4302	29.8687
		45.6686	32.637
		43.9374	27.3222
		46.2413	27.7144
	Total length/field(mm)	43.8187	33.3465
		45.101	29.5591
		43.1918	28.2845
		45.4957	34.2211
		42.2552	23.8237
		38.9193	26.8114
		42.7609	31.267
		40.4879	25.6246
