# Supplementary material for: Amino acid transporter SLC38A5 regulates developmental and pathological retinal angiogenesis
Source: eLife journal article supplement (doi:10.7554/elife.73105), 2022-11-18
Supplement: fig6-data1 [file Figure 6 source data.xlsx]

## Sheet: Fig 6A
	Group	si-Ctrl	si-SLC38A5
		92.3544	74.958
	Glutamine concentration in cell lysate	93.5641	68.2639
	(uM)	90.4976	68.2017
		93.1825	69.5545
	Group	si-Ctrl	si-SLC38A5
		82.8812	105.141
	Glutamine concentration in medium	76.3105	97.1703
	(uM)	76.1304	95.5911
		72.6625	94.4717

## Sheet: Fig 6D
	Group	Gln 0+DON 0	Gln 2mM+DON 0	Gln 2mM+DON 0.1mM
		0.375	0.458	0.366
		0.372	0.472	0.36
	Absorbance of 570nm	0.376	0.446	0.345
		0.34	0.425	0.34
		0.323	0.417	0.331
		0.325	0.407	0.325

## Sheet: Fig 6E
	Group	Gln 0+DON 0	Gln 2mM+DON 0	Gln 2mM+DON 0.1mM
		0.351825	0.702159	0.476329
		0.40647	0.681149	0.491594
	Migrated ratio	0.426803	0.669876	0.436335
		0.360923	0.588052	0.442237
		0.34455	0.581175	0.37978
		0.384711	0.542641	0.300976

## Sheet: Fig 6F
	Group	Gln 0+DON 0	Gln 2mM+DON 0	Gln 2mM+DON 0.1mM
		18994	27040	22031
		20401	26740	24387
	Total vessel length/field	21385	27113	24068
		21102	26740	24820
		20259	25794	23802
