# Supplementary material for: Amino acid transporter SLC38A5 regulates developmental and pathological retinal angiogenesis
Source: eLife journal article supplement (doi:10.7554/elife.73105), 2022-11-18
Supplement: fig7-data1 [file Figure 7 source data.xlsx]

## Sheet: Sheet1
GENES	SiCTRL			SiSLC38A5
VEGFR1	0.98	0.99	1.03	1.68	1.71	1.62
VEGFR2	0.89	1.02	1.1	0.37	0.31	0.25
TIE2	0.99	1.01	1	0.42	0.47	0.39
FGFR1	0.96	1.05	0.99	0.53	0.6	0.62
FGFR2	0.95	1.05	1	1.04	1.09	1.34
FGFR3	1.08	1.03	0.9	1.94	2.24	2.27
IGF1R	1.06	1.05	0.91	0.48	0.57	0.61
IGF2R	0.9	1.14	0.97	0.77	0.75	0.81
ERK1	1	1.01	0.99	0.4	0.37	0.37
ERK2	1.11	0.9	1	0.43	0.41	0.4
mTOR	1.02	0.98	1	0.41	0.39	0.41
